# Supplementary material
Source: PubMed Central journal article supplement (PMC4355052)

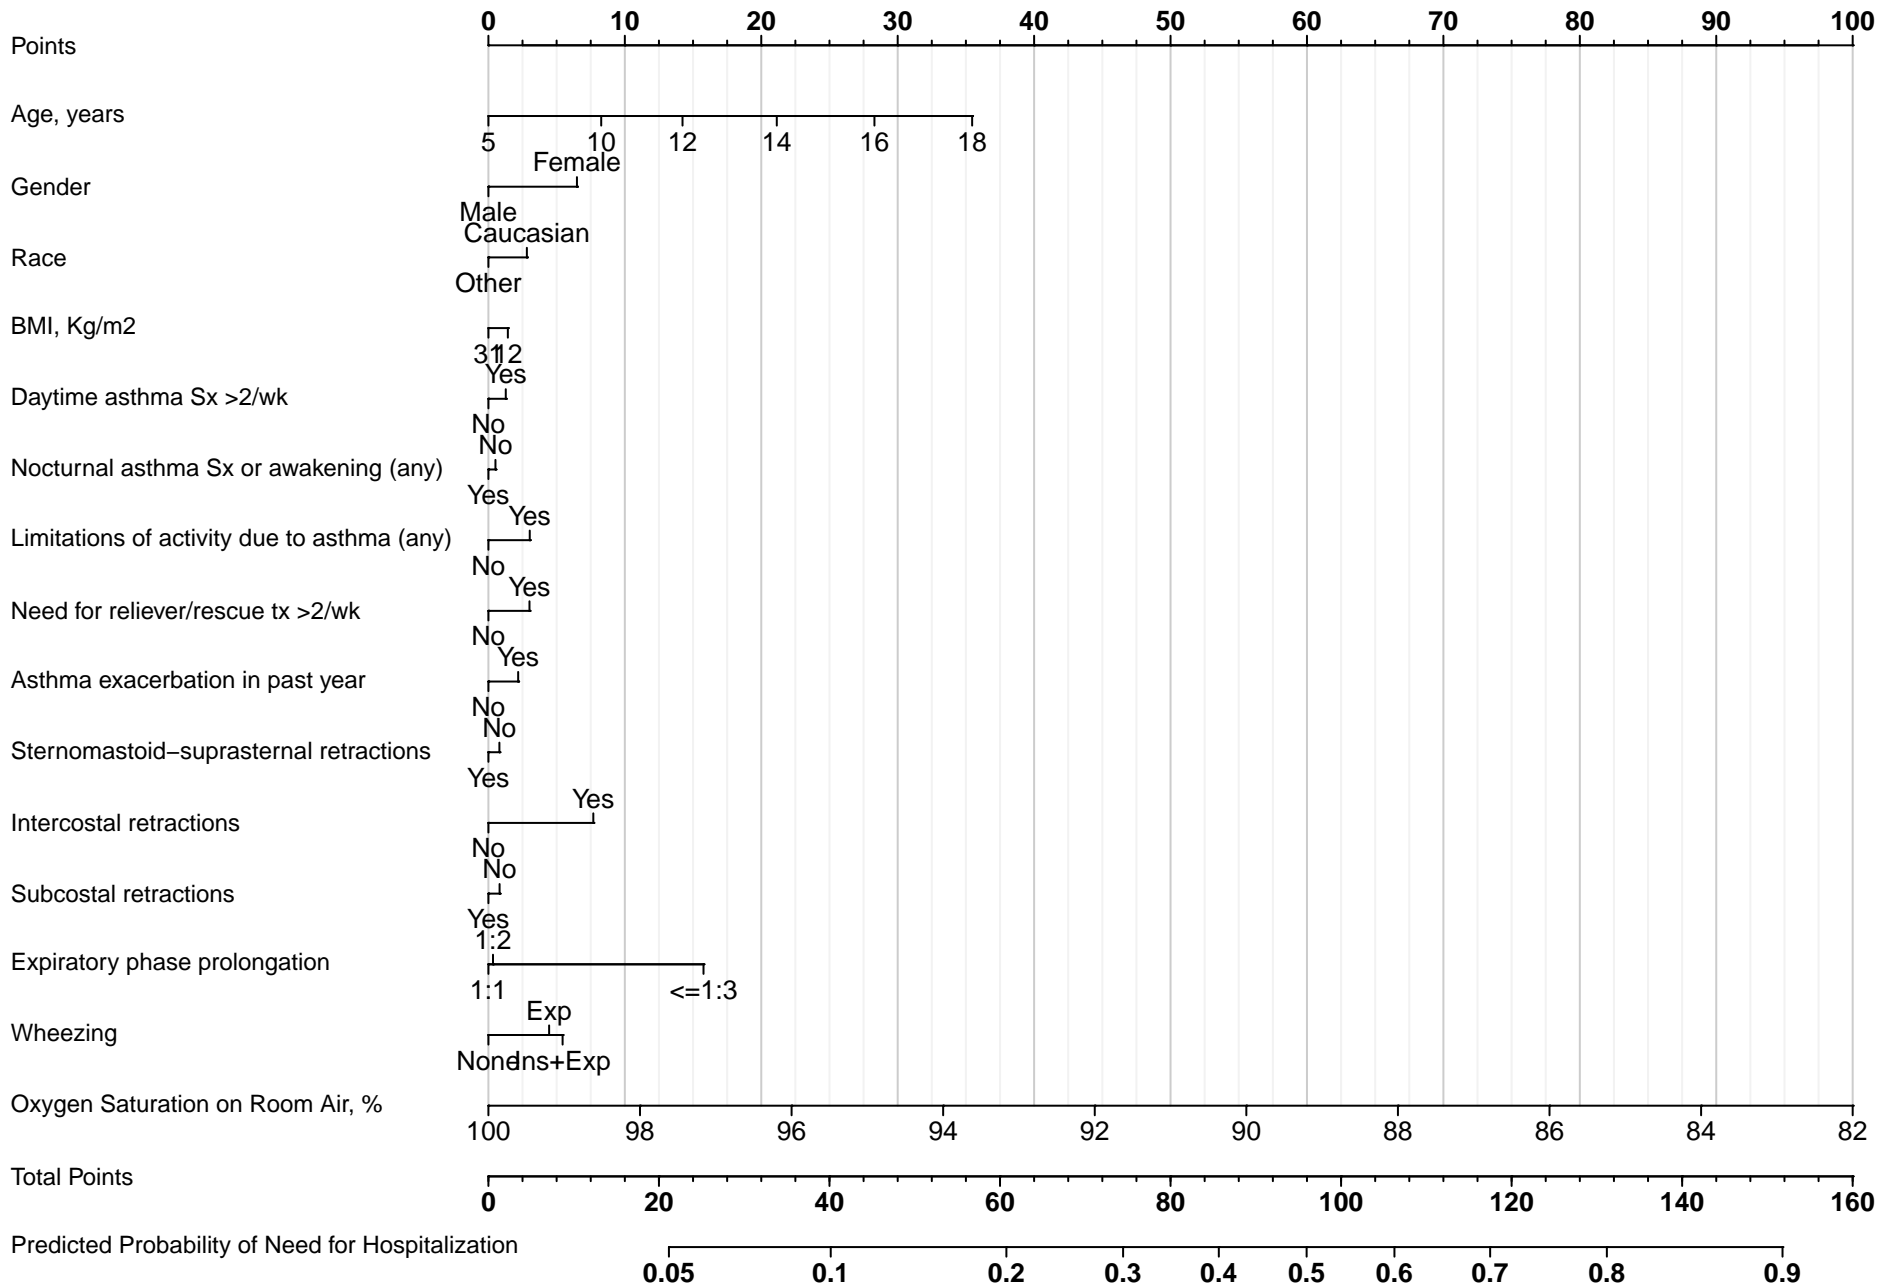

Supplement: NIHMS639599-supplement-3.pdf [file NIHMS639599-supplement-3.pdf]

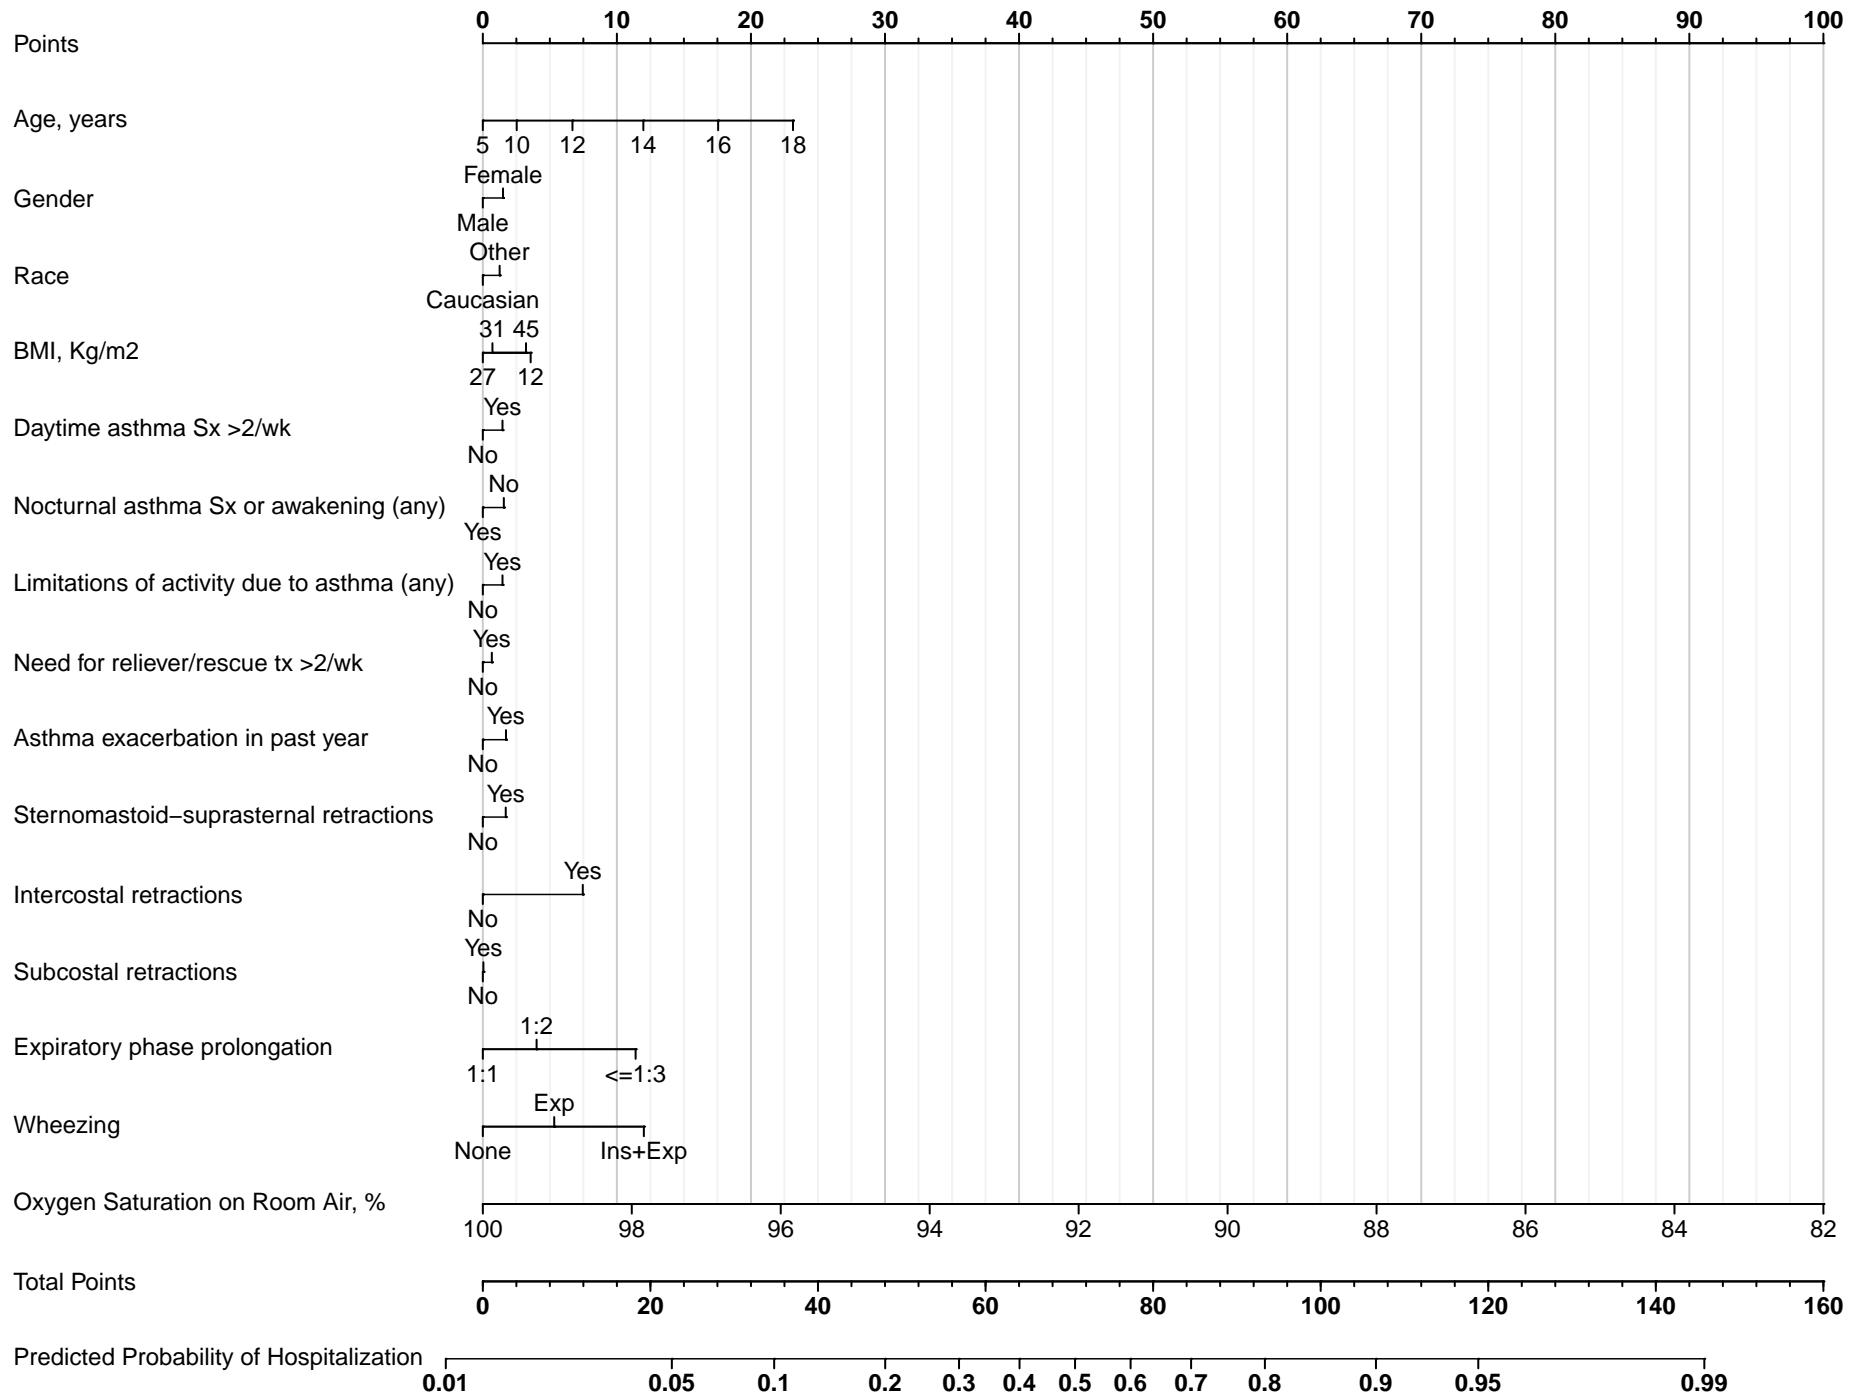

Supplement: NIHMS639599-supplement-4.pdf [file NIHMS639599-supplement-4.pdf]

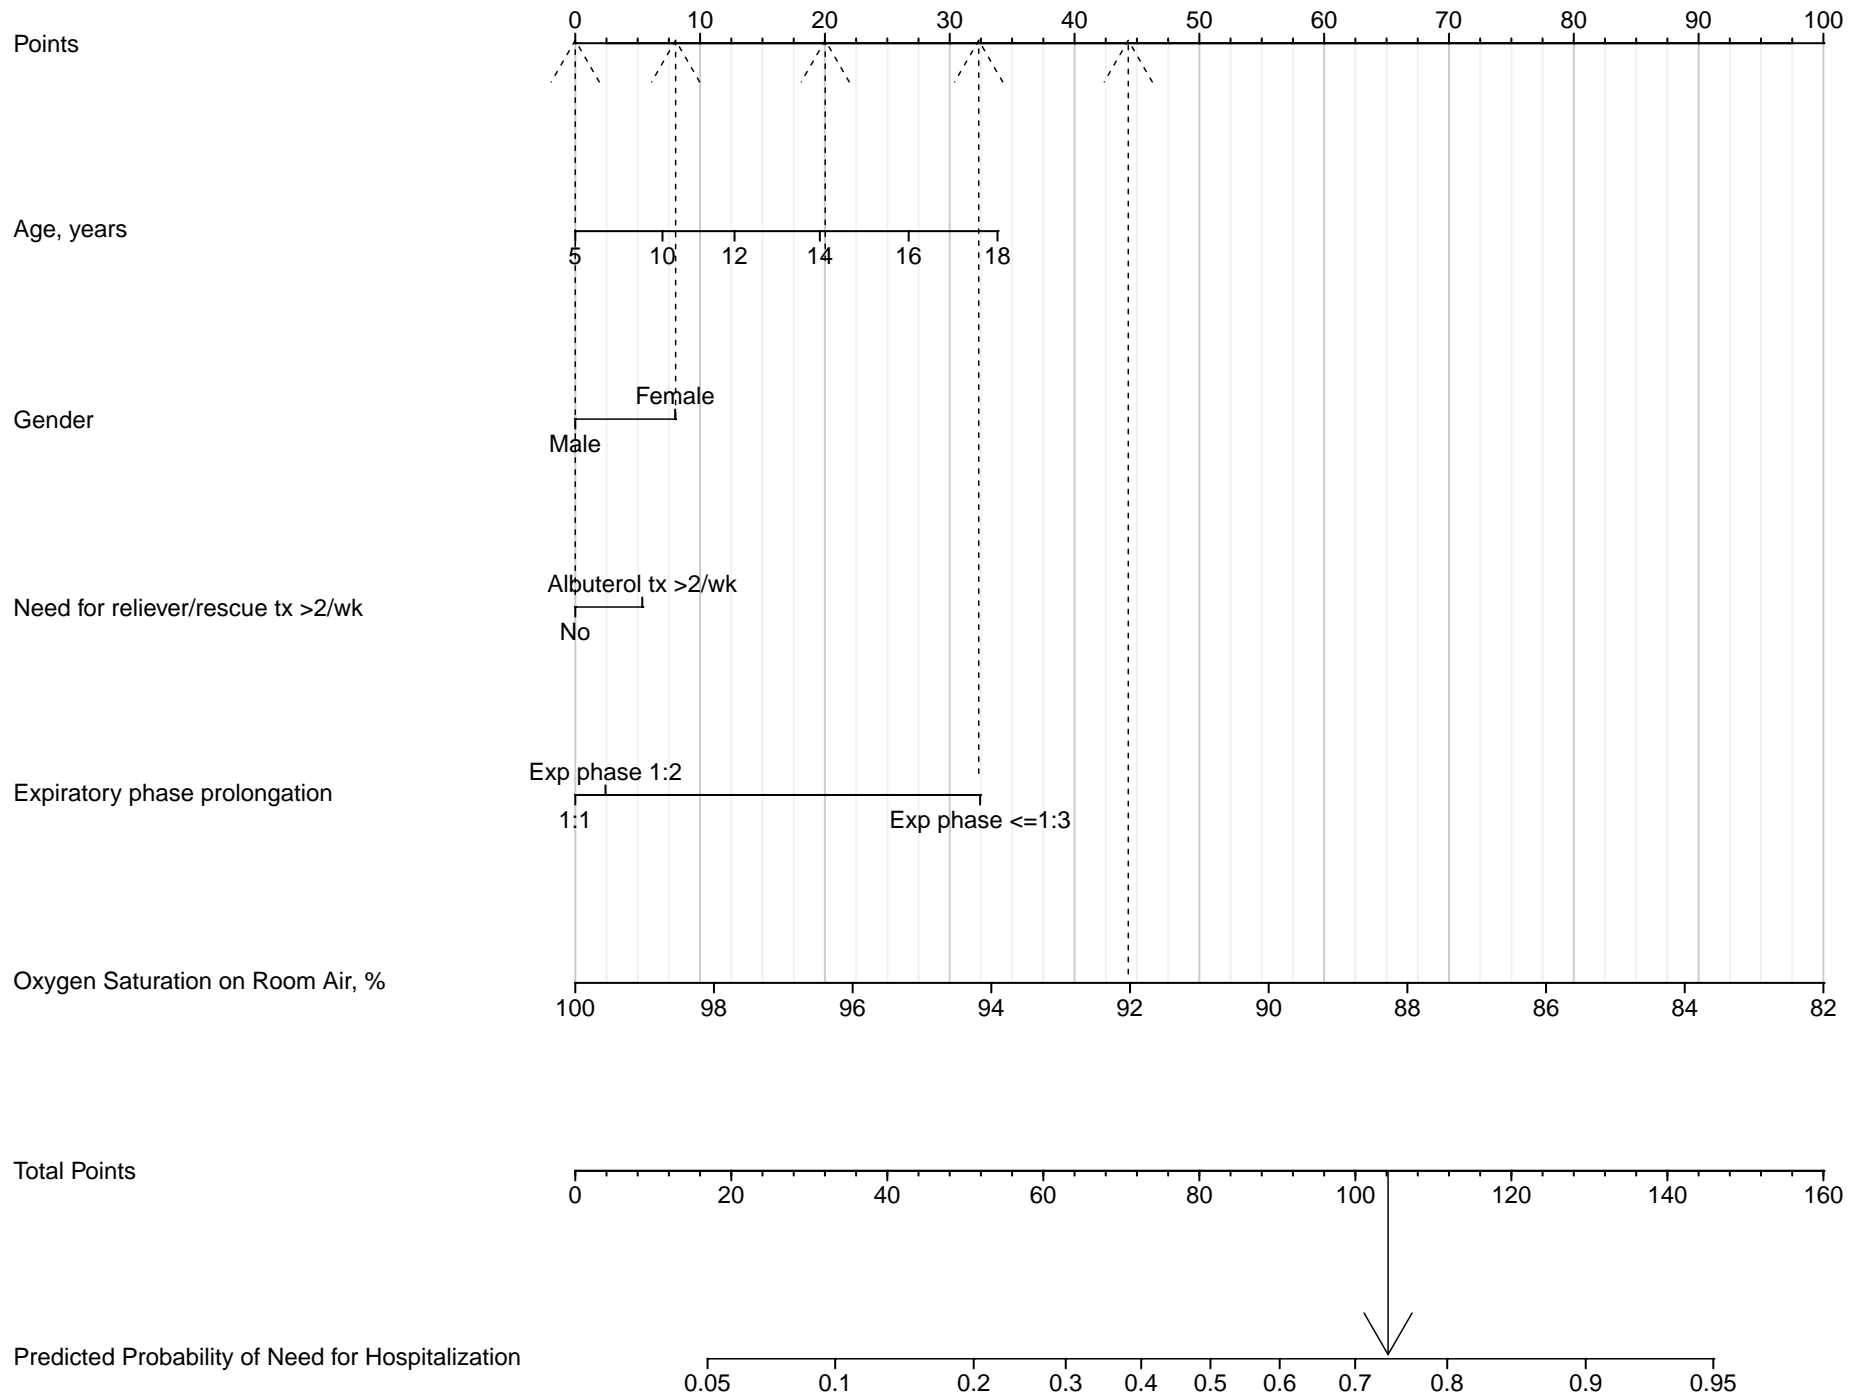

Supplement: NIHMS639599-supplement-7.pdf [file NIHMS639599-supplement-7.pdf]
